# Supplementary material
Source: HighWire-hosted journal article supplement (https://erj.ersjournals.com/highwire/filestream/126809/field_highwire_adjunct_files/0/ERJ-00402-2015_Supplement.pdf)
Supplement: ERJ-00402-2015_Supplement.pdf [file ERJ-00402-2015_Supplement.pdf]

**Supplementary table S1.** Subdistribution hazard ratios (SHR) with 95% confidence intervals (CI) for venous thromboembolism (VTE) by chronic obstructive pulmonary disease (COPD) stages, calculated by the Fine and Gray competing risk model with death as competing outcome.

| <b>COPD stadium</b> | <b>SHR <sup>*μ</sup></b> | <b>SHR <sup>*§</sup></b> |
|---------------------|--------------------------|--------------------------|
| Normal              | 1.00                     | 1.00                     |
| Stage I             | 0.99 (0.65-1.52)         | 1.05 (0.68-1.62)         |
| Stage II            | 1.10 (0.74-1.51)         | 1.10 (0.77-1.57)         |
| Stage III/IV        | 1.34 (0.73-2.45)         | 1.39 (0.76-2.55)         |
| <i>p for trend</i>  | 0.5                      | 0.5                      |

\*Death is competing event, using age as the time function.

<sup>μ</sup> Age was timescale. Adjusted for sex, 95% CI.

<sup>§</sup> Age was timescale. Adjusted for sex, current smoking, body mass index and cardiovascular diseases (self-reported myocardial infarction, angina, stroke), 95% CI.
